# Supplementary material for: Photoresponsive behaviors of smectic liquid crystals tuned by an azobenzene chromophore
Source: Royal Society of Chemistry journal article supplement (doi:10.1039/c1ra00615k), 2011-11-10
Supplement: c1ra00615k.pdf [file c1ra00615k.pdf]

**Supplementary information to:**

**Photoresponsive behaviors of smectic liquid crystals tuned by an azobenzene chromophore**

Guojie Wang,\* Mingzhi Zhang, Tingting Zhang, Jingjing Guan, Huai Yang\*

School of Materials Science and Engineering, University of Science and Technology Beijing, Beijing  
100083, China

E-mail: guojie.wang@mater.ustb.edu.cn (Guojie Wang), yanghuai@mater.ustb.edu.cn (Huai Yang).

TEL: 86-10-62333759

FAX: 86-10-62333759

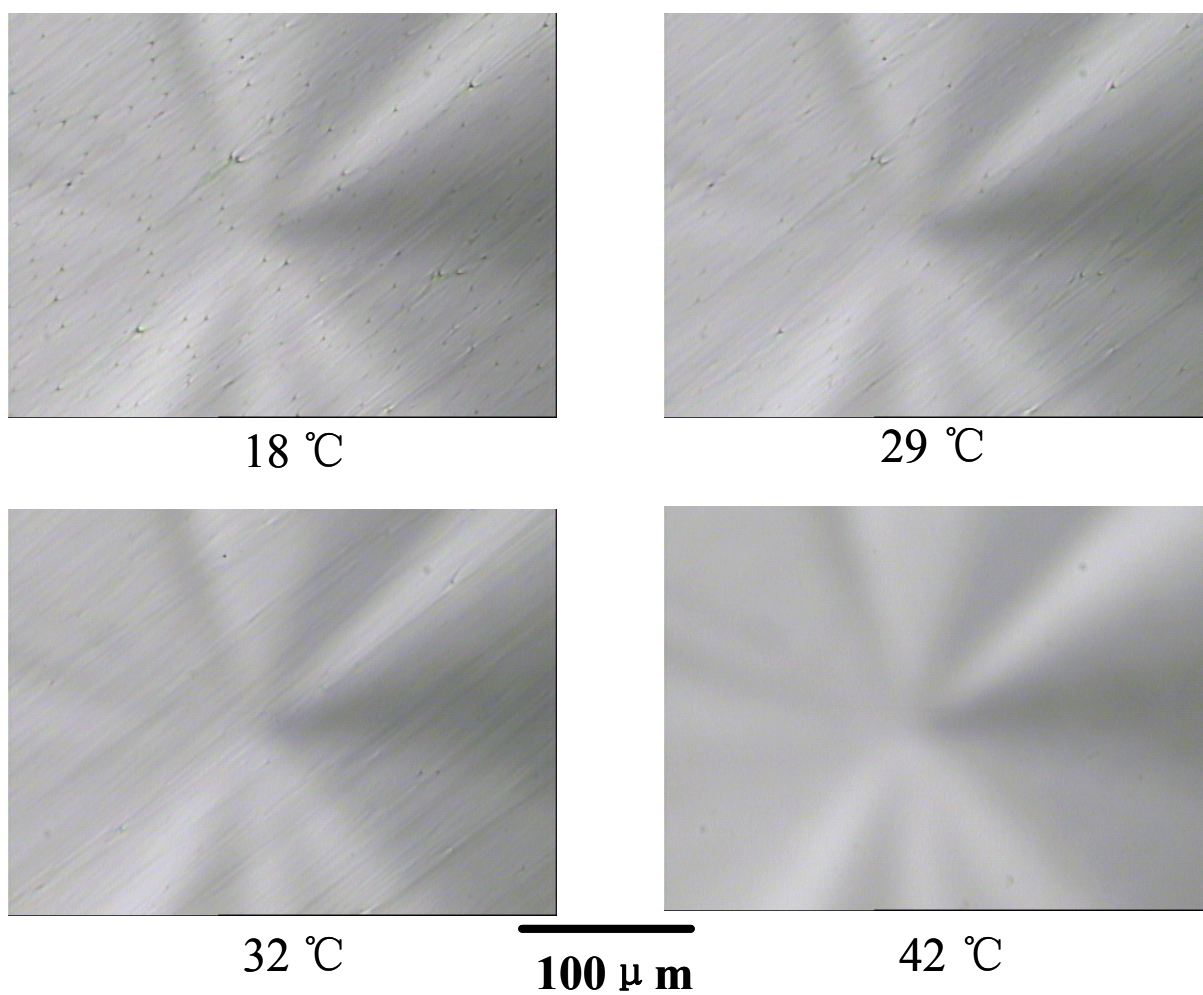

**Figure S1.** Polarized optical micrographs of 8CB at different temperatures. The smectic textures are shown in graphs at 18°C and 29°C; the nematic texture is shown in graph at 32 °C; the isotropic is shown at 42°C.

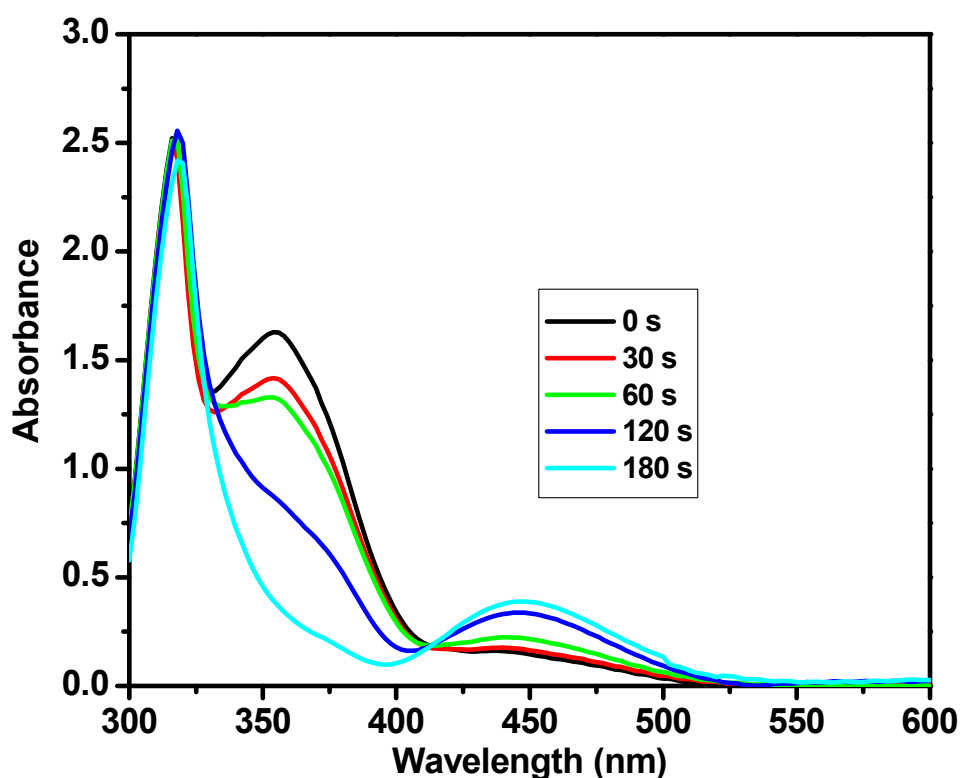

**Figure S2.** UV-Vis absorption spectra of LC-A<sub>2</sub> (95% of 8CB, 5% of the azobenzene AB) under UV irradiation (365 nm, 10 mw/cm<sup>2</sup>) for 0, 30, 60, 120, and 180 s, at 21 °C.

The *cis* isomer fraction  $Y^1$  was determined from the absorbance by

$$Y = 1.05 \times (1 - A/A_0)$$

Where  $A_0$  and  $A$  are the maximum absorbance at the  $\pi$ - $\pi^*$  transition band before and after UV irradiation, respectively.

A photostationary state for the sample LC-A<sub>1</sub> was reached upon UV irradiation for 180s, shown in Figure 2S. The *cis* isomer fractions were measured to be 0%, 14%, 19%, 49%, and 80% upon UV irradiation for 0 s, 30 s, 60 s, 120 s, and 180 s, respectively.

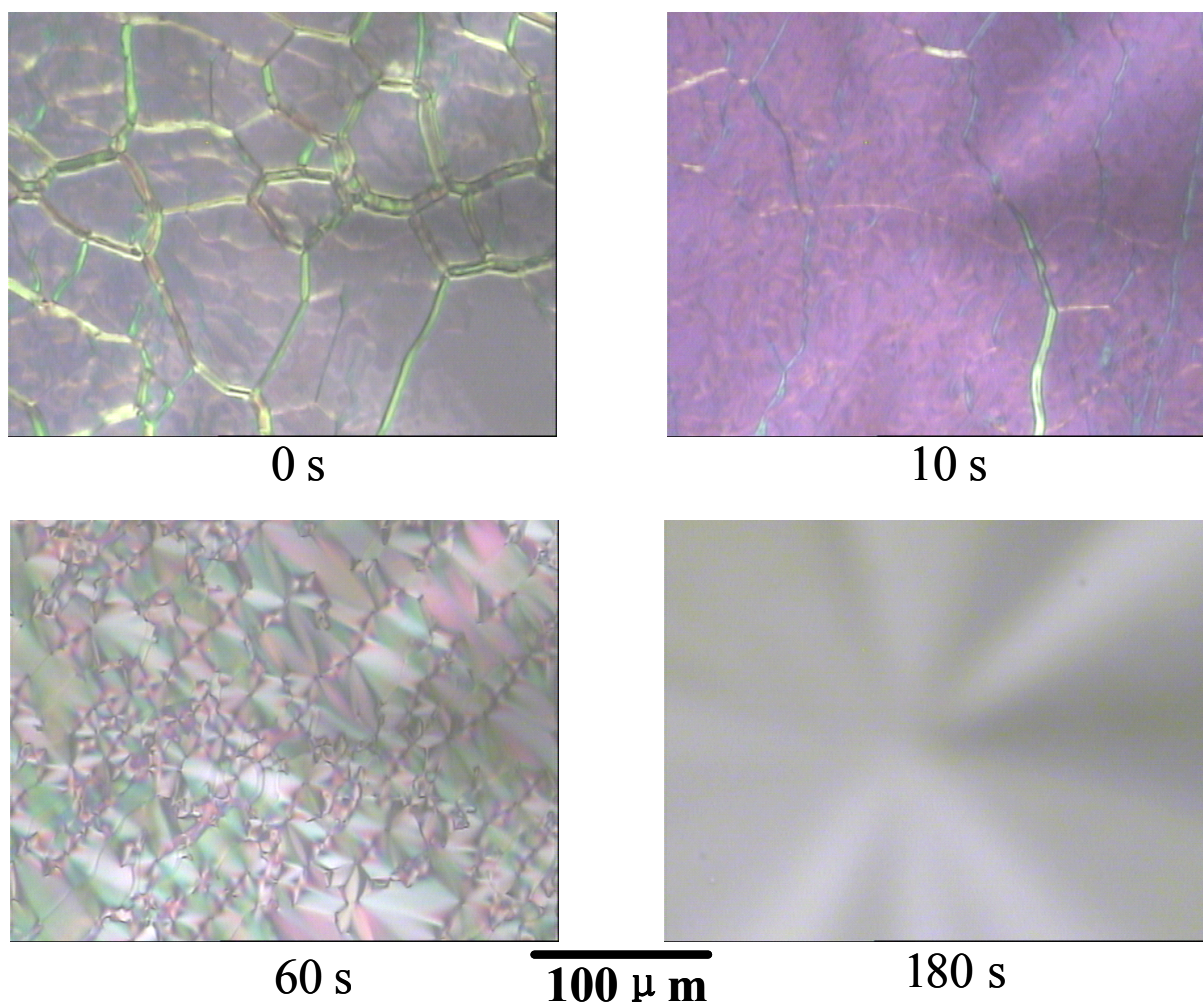

**Figure S3.** Polarized optical micrographs of LC mixture LC-A-B<sub>3</sub> (92.5% of 8CB, 5% of AB, 2.5% of BD) under UV irradiation (365 nm, 10 mw/cm<sup>2</sup>) for 0, 10, 60 and 180s, at 28°C.

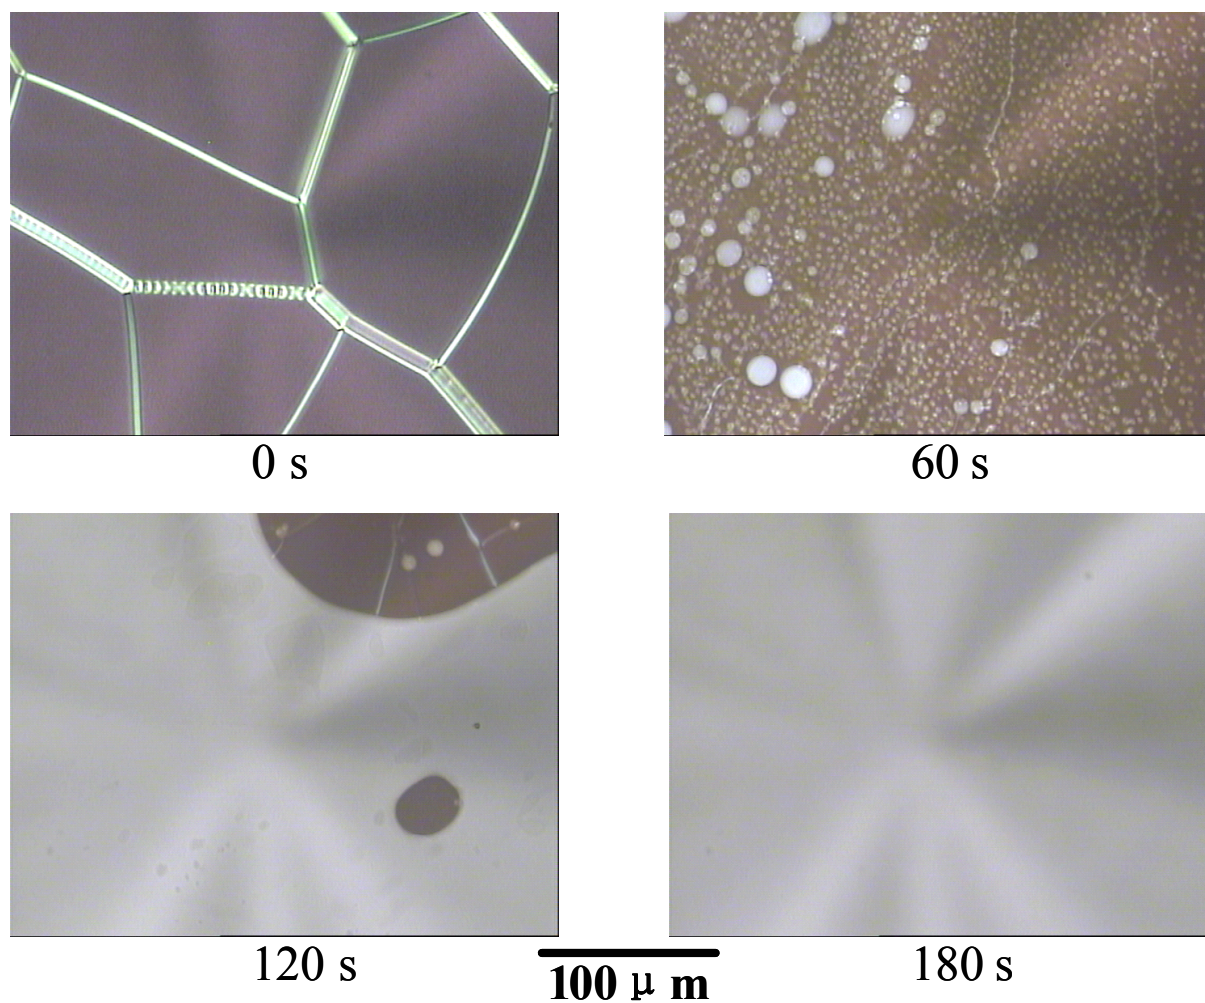

**Figure S4.** Polarized optical micrographs of LC mixture LC-A-B<sub>5</sub> (90% of 8CB, 5% of AB, 5% of BD) under UV irradiation (365 nm, 10 mw/cm<sup>2</sup>) for 0, 60, 120 and 180s, at 28°C.

#### Reference

- (1) Victor, J. G.; Torkelson, J. M. *Macromolecules* 1987, **20**, 2951–2954.
